# Supplementary material
Source: Royal Society of Chemistry journal article supplement (doi:10.1039/d6cc01491g)
Supplement: d6cc01491g1.pdf [file d6cc01491g1.pdf]

## Supplementary Data

### From Screening to Stepwise Lithiation: Computational Insights into Fe–Porphyrin for Li-Ion Batteries

Hemjot Kaur<sup>a</sup>, Neetu Goel<sup>a,\*</sup>

<sup>a</sup> Computational and Theoretical Chemistry Group, Department of Chemistry & Centre for Advanced Studies in Chemistry, Panjab University, Chandigarh-160014, India

\* Corresponding author, [neetugoel@pu.ac.in](mailto:neetugoel@pu.ac.in)

**Table S1.** The optimized geometries of the MPr@AM and nearest atom distance of AM with MPr.

| System  | Optimized Geometry                                                                            | System  | Optimized Geometry                                                                              |
|---------|-----------------------------------------------------------------------------------------------|---------|-------------------------------------------------------------------------------------------------|
| MnPr@Li | 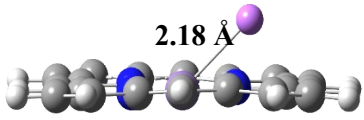<br>2.18 Å   | CoPr@Li | <br>2.17 Å   |
| MnPr@Na | <br>2.53 Å | CoPr@Na | <br>2.54 Å |
| MnPr@K  | <br>2.89 Å | CoPr@K  | <br>2.89 Å  |
| FePr@Li | <br>2.17 Å | NiPr@Li | <br>2.11 Å  |
| FePr@Na | <br>2.49 Å | NiPr@Na | <br>2.48 Å  |
| FePr@K  | <br>2.82 Å | NiPr@K  | <br>2.86 Å  |

|         |                                                                                   |         |                                                                                    |
|---------|-----------------------------------------------------------------------------------|---------|------------------------------------------------------------------------------------|
| CuPr@Li | 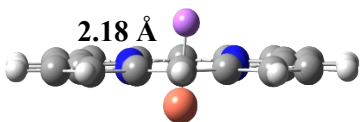 | ZnPr@Li |  |
| CuPr@Na |  | ZnPr@Na |  |
| CuPr@K  |  | ZnPr@K  |  |

**Table S2.** Structural parameters for FePr@7Li and FePr@8Li, including RMSD (Å), Fe-N bond length  $d$  (Å), and dihedral angles  $\phi$  (°). Atom labeling follows the optimized geometry shown in Fig. 1A.

| Structural parameter                                    | FePr@7Li                                                                           | FePr@8Li                                                                            |
|---------------------------------------------------------|------------------------------------------------------------------------------------|-------------------------------------------------------------------------------------|
| Geometry                                                | 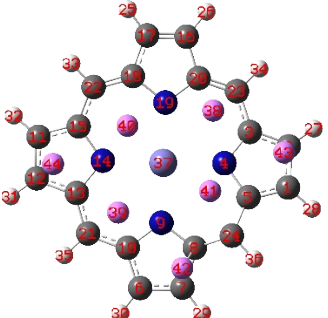 |  |
| RMSD*                                                   | Reference                                                                          | 0.3598                                                                              |
| $d_{\text{Fe-N}}$                                       | 2.03                                                                               | 1.99                                                                                |
| $\Phi(\text{Fe}_{37}\text{N}_4\text{C}_3\text{C}_{23})$ | 21.74                                                                              | 26.96                                                                               |
| $\Phi(\text{N}_4\text{C}_3\text{C}_{23}\text{N}_{19})$  | -6.17                                                                              | -9.78                                                                               |
| $\Phi(\text{N}_4\text{C}_5\text{C}_{24}\text{N}_9)$     | 21.96                                                                              | 16.19                                                                               |

\*The root-mean-square deviation (RMSD) was calculated according to the following expression [1]:

$$\sqrt{\frac{1}{N} \sum_i^N [(x_i - x'_i)^2 + (y_i - y'_i)^2 + (z_i - z'_i)^2]}$$

where  $N$  is the number of atoms, and  $(x_i, y_i, z_i)$  and  $(x'_i, y'_i, z'_i)$  are the Cartesian coordinates of atom  $i$  in the compared (FePr@8Li) and reference (FePr@7Li) structures, respectively. Prior to RMSD evaluation, optimal least-squares superposition was performed using the Kabsch algorithm [2] to remove rotational and translational contributions. FePr@7Li was taken as the reference structure. The following figure shows the superposition of optimized FePr@7Li (reference) and FePr@8Li structures after optimal least-squares alignment using the Kabsch algorithm. The FePr@7Li reference geometry is shown with sky-blue bonds and blue atoms, while the FePr@8Li structure is shown with orange bonds and pink atoms. Overall rotational and translational motions have been removed prior to comparison. Green connectors highlight the atomic deviations between the two structures, clearly illustrating the lithiation-induced geometric distortion upon adsorption of the eighth Li atom.

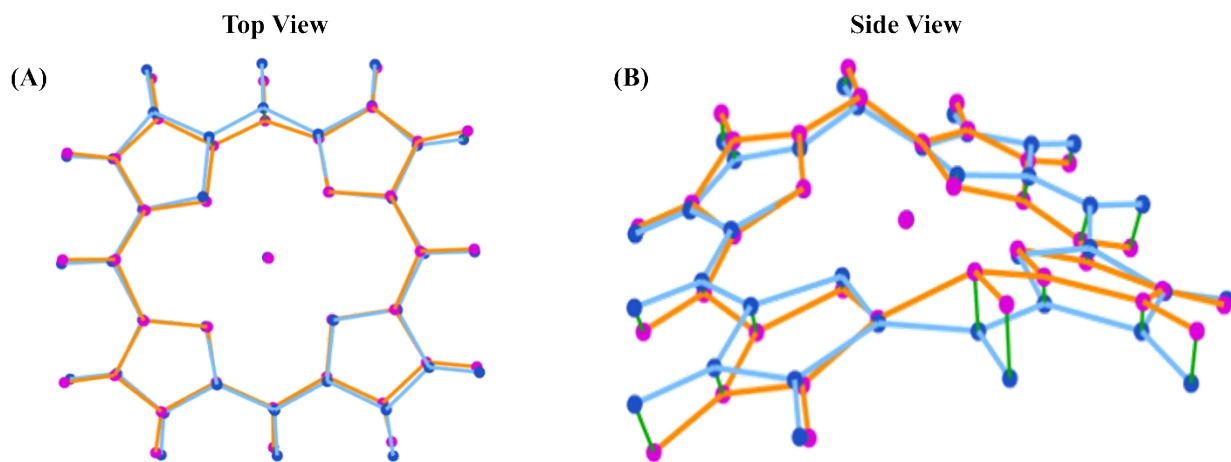

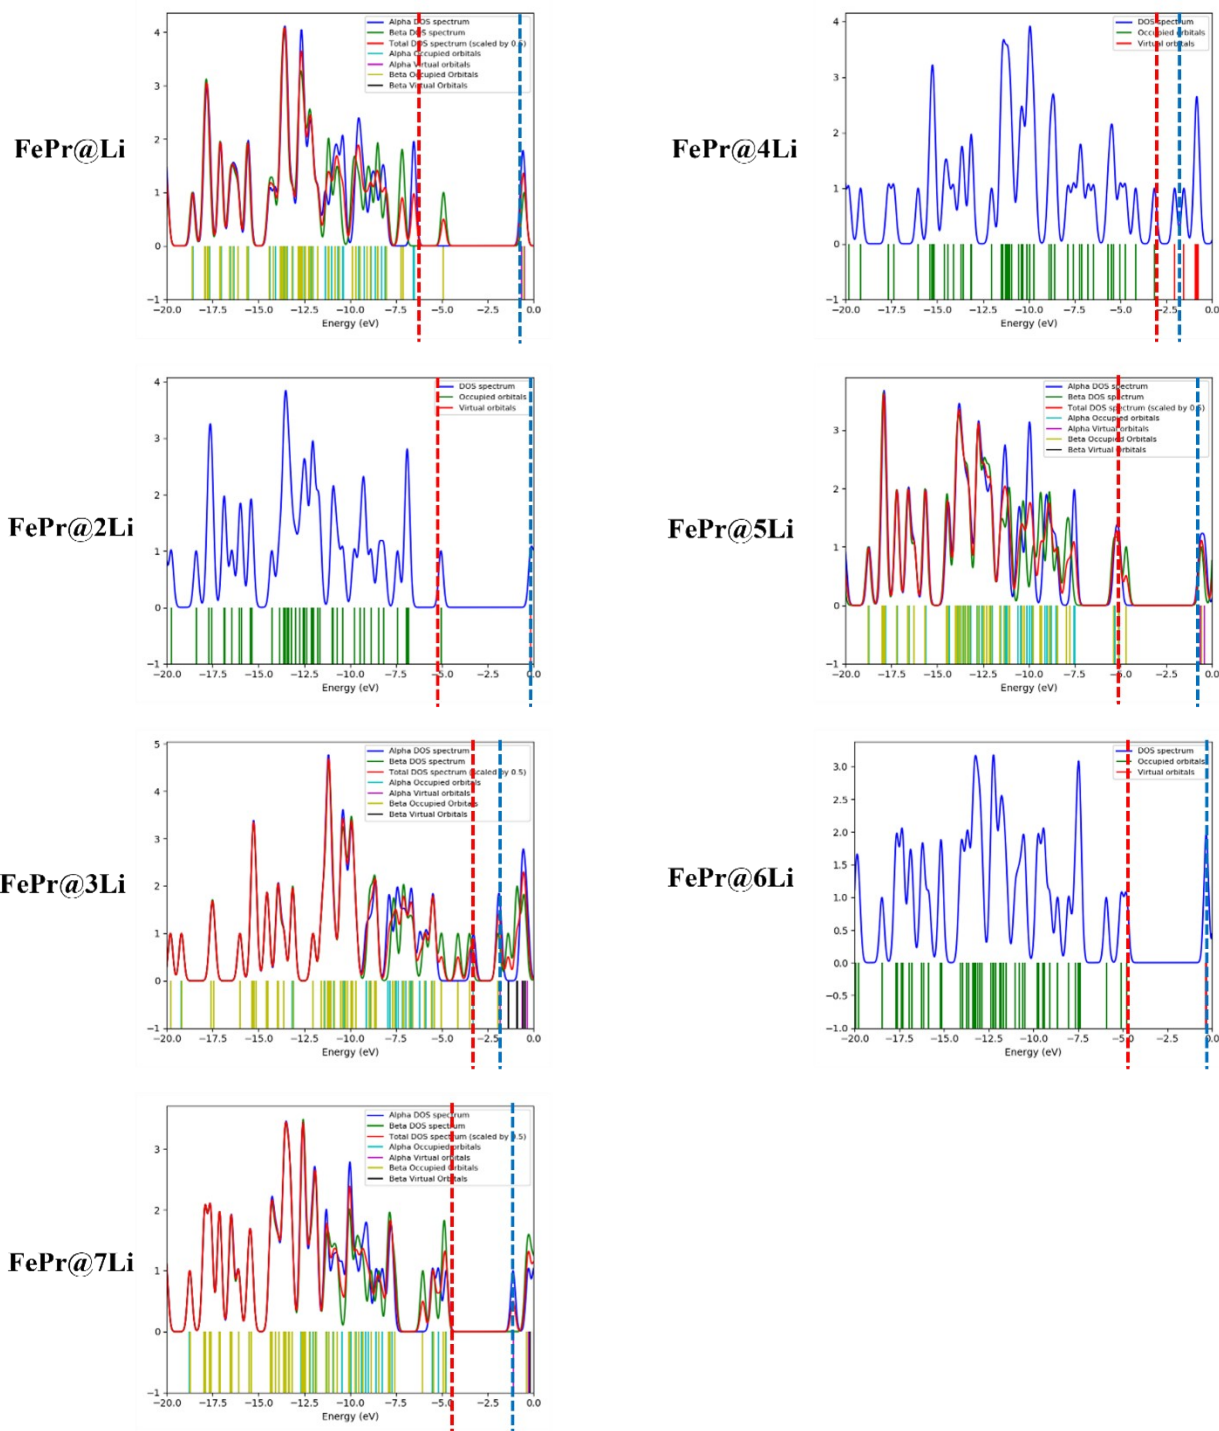

**Fig. S1.** The DOS plots of the FePr@nLi. Vertical dashed lines denote the HOMO (red) and LUMO (blue) values. The band gap corresponds to the zero-DOS region between these levels, apparent DOS intensity near the gap edges arises from Gaussian broadening of discrete molecular orbitals.

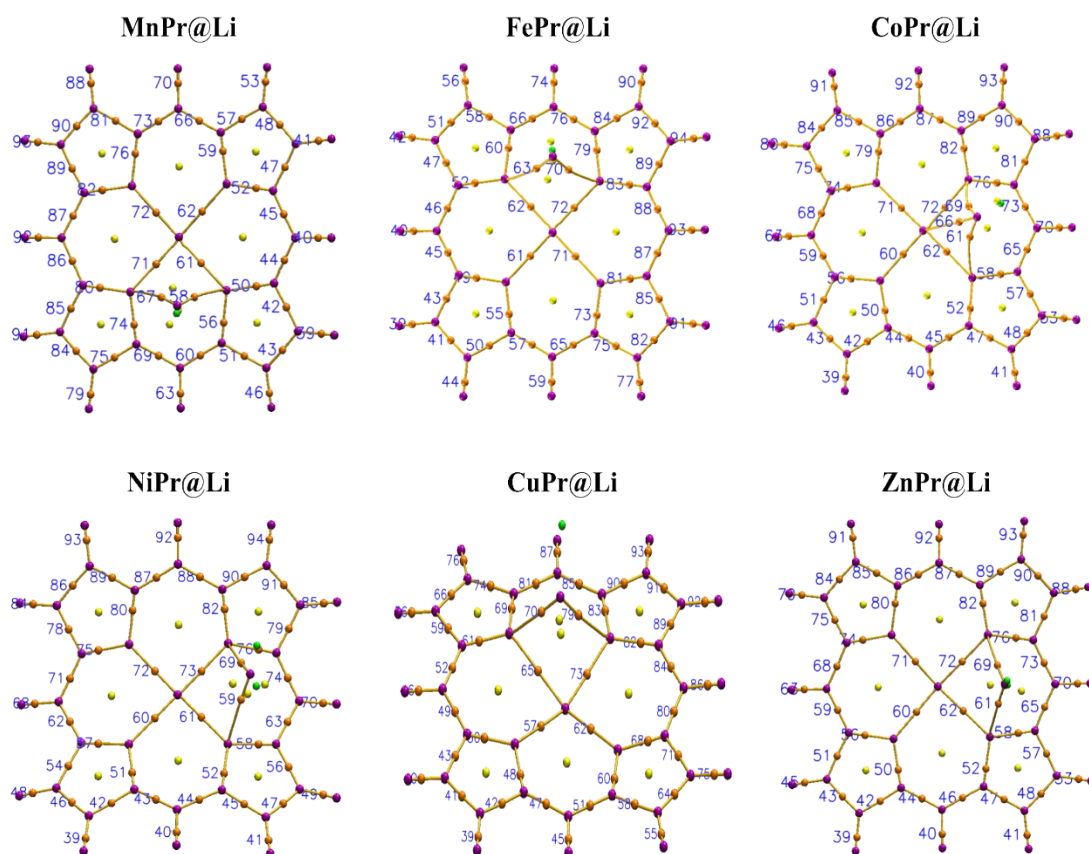

**Fig. S2.** QTAIM bond paths and BCPs for Li–MPr interactions (labelled BCPs correspond to Table 2).

**Table S3.** Selected NBO second-order perturbation (donor  $\rightarrow$  acceptor) analysis showing stabilization energies  $E(2)$  (kcal mol<sup>-1</sup>), donor-acceptor energy differences  $E(j)-E(i)$  (a.u.), and Fock matrix element  $F(i,j)$  (a.u.) for MPr@Li and successive lithiation.

| System   | Donor (i)      | Acceptor (j)   | $E(2)$ | $E(j) - E(i)$ | $F(i,j)$ |
|----------|----------------|----------------|--------|---------------|----------|
| MnPr@Li  | BD*(2) C17–C18 | BD*(2) C15–C22 | 389.88 | 0.01          | 0.093    |
| FePr@Li  | BD*(2) C3–N4   | BD*(2) C20–C23 | 140.32 | 0.06          | 0.137    |
| CoPr@Li  | BD*(2) C8–C24  | BD*(2) C6–C7   | 222.60 | 0.01          | 0.077    |
| NiPr@Li  | BD*(2) C3–N4   | BD*(2) C20–C23 | 120.12 | 0.08          | 0.151    |
| CuPr@Li  | BD*(2) C3–N4   | BD*(2) C20–C23 | 189.83 | 0.05          | 0.118    |
| ZnPr@Li  | LP(1) C15      | BD*(2) C13–N14 | 67.33  | 0.10          | 0.110    |
| FePr@2Li | BD*(2) C6–C10  | BD*(2) C7–C8   | 339.57 | 0.02          | 0.096    |
| FePr@3Li | LP(1) Li40     | LP*(1) Li39    | 231.86 | 0.01          | 0.096    |
| FePr@4Li | LP(1) C18      | BD*(2) N19–C20 | 128.84 | 0.12          | 0.112    |
| FePr@5Li | LP*(1) Li38    | LP*(1) Li40    | 196.21 | 0.01          | 0.095    |
| FePr@6Li | BD*(2) C2–C3   | BD*(2) C20–C23 | 214.18 | 0.02          | 0.084    |
| FePr@7Li | LP(1) C22      | BD*(2) C18–N19 | 191.78 | 0.13          | 0.197    |

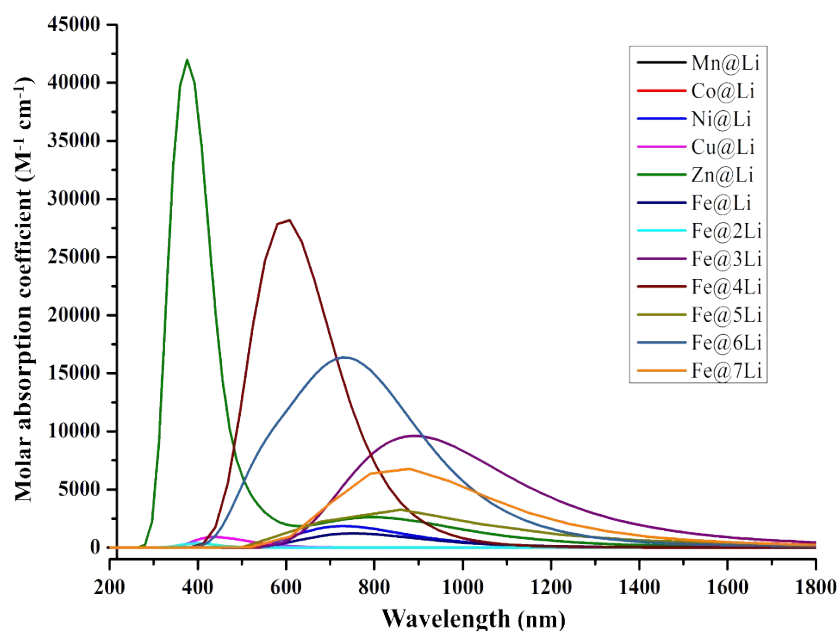

**Fig. S3.** Simulated UV–Vis spectra for Li-MPr systems in IEF-PCM (acetonitrile).

**Table S4.** TD-DFT vertical excitation energies ( $E$ , eV), corresponding wavelengths ( $\lambda$ , nm), oscillator strengths ( $f$ ) and main orbital contributions (%) for MPr@Li systems in gas phase and with solvent (IEF-PCM, acetonitrile).

| System   | Without Solvent |           |        |                                                                  | With Solvent |           |        |                                                                 |
|----------|-----------------|-----------|--------|------------------------------------------------------------------|--------------|-----------|--------|-----------------------------------------------------------------|
|          | $E$             | $\lambda$ | $f$    | Major composition                                                | $E$          | $\lambda$ | $f$    | Major composition                                               |
| MnPr@Li  | 1.571           | 789.07    | 0.0012 | H $\rightarrow$ L (44.08%),<br>H $\rightarrow$ L+3<br>(30.35%)   | 2.827        | 438.51    | 0.0305 | H-1 $\rightarrow$ L (59.28%),<br>H-2 $\rightarrow$ L+1 (37.08%) |
| CoPr@Li  | 2.391           | 518.53    | 0.0147 | H $\rightarrow$ L+1<br>(34.22%), H-1 $\rightarrow$<br>L (23.17%) | 1.375        | 901.69    | 0.0001 | H-2 $\rightarrow$ L+1<br>(86.12%), H $\rightarrow$ L<br>(6.67%) |
| NiPr@Li  | 1.511           | 820.39    | 0.0052 | H $\rightarrow$ L+3<br>(32.09%)                                  | 1.688        | 734.42    | 0.0379 | H $\rightarrow$ L (33.29%), H-<br>1 $\rightarrow$ L+1 (20.89%)  |
| CuPr@Li  | 1.460           | 848.98    | 0.0003 | H $\rightarrow$ L (78.49%),<br>H $\rightarrow$ L+1<br>(19.93%)   | 2.940        | 421.64    | 0.0151 | H-1 $\rightarrow$ L (4.38%), H-<br>4 $\rightarrow$ L+1 (10.24%) |
| ZnPr@Li  | 3.231           | 383.71    | 0.4188 | H $\rightarrow$ L+2<br>(87.47%), H-2 $\rightarrow$<br>L (26.42%) | 3.110        | 398.63    | 0.7288 | H $\rightarrow$ L+1 (88.38%),<br>H-1 $\rightarrow$ L (44.98%)   |
| FePr@Li  | 1.480           | 838.04    | 0.0004 | H $\rightarrow$ L (20.90%),<br>H $\rightarrow$ L+1 (8.16%)       | 1.647        | 752.80    | 0.0302 | H $\rightarrow$ L+1 (27.97%),<br>H-1 $\rightarrow$ L (21.09%)   |
| FePr@2Li | 1.843           | 672.60    | 0.0042 | H $\rightarrow$ L+2<br>(75.20%), H-1 $\rightarrow$<br>L (11.45%) | 3.201        | 387.34    | 0.0062 | H $\rightarrow$ L+2 (85.94%),<br>H $\rightarrow$ L+3 (3.07%)    |
| FePr@3Li | 1.274           | 973.34    | 0.0007 | H-1 $\rightarrow$ L<br>(97.87%), H $\rightarrow$ L<br>(11.42%)   | 1.392        | 890.69    | 0.2368 | H-1 $\rightarrow$ L (2.61%)                                     |
| FePr@4Li | 1.918           | 646.44    | 0.1705 | H $\rightarrow$ L+3                                              | 1.938        | 639.92    | 0.3901 | H $\rightarrow$ L+1 (93.11%)                                    |

|          |       |        |        |                                        |       |        |        |                                      |
|----------|-------|--------|--------|----------------------------------------|-------|--------|--------|--------------------------------------|
|          |       |        |        | (95.34%)                               |       |        |        |                                      |
| FePr@5Li | 1.466 | 845.81 | 0.0578 | H-1 → L+2 (10.12%), H-1 → L+2 (10.12%) | 1.529 | 810.90 | 0.0242 | H-2 → L (18.22%), H-1 → L (17.99%)   |
| FePr@6Li | 1.529 | 811.07 | 0.0223 | H → L+1 (43.19%), H-1 → L (25.27%)     | 1.628 | 761.63 | 0.3508 | H → L (92.93%)                       |
| FePr@7Li | 1.285 | 964.87 | 0.0101 | H-2 → L (87.06%), H-1 → L (17.76%)     | 1.361 | 911.17 | 0.0565 | H-1 → L+1 (82.34%), H → L+1 (49.71%) |

#### References:

1. Xie J, Shi H, Shen C, Huan L, He M, Chen M. Heteroatom-bridged pillar [4] quinone: evolutionary active cathode material for lithium-ion battery using density functional theory. *Journal of Chemical Sciences*. 2021 Mar;133(1):2.
2. Kabsch W. A discussion of the solution for the best rotation to relate two sets of vectors. *Foundations of Crystallography*. 1978 Sep 1;34(5):827-8.
